# Supplementary material for: Convection-driven microfabricated hydrogels for rapid biosensing
Source: Royal Society of Chemistry journal article supplement (doi:10.1039/d0an01069c), 2020-01-01
Supplement: d0an01069c1.pdf [file d0an01069c1.pdf]

## Electronic Supplementary Information

**Fig. S1** Mass inclusion/exclusion of rhodamine-conjugated proteins using hydrogel posts.

For further characterization of mesh size, PEG-DA/AC-PEG-Biotin posts were dried and then rehydrated by the addition of PBS containing proteins of varying hydrodynamic radii conjugated to rhodamine ( $\beta$ -lactoglobulin A,  $M_w$  18.4 kDa,  $R_{HYD}$  2 nm (Ahmadi et al., 2015); SOD,  $M_w$  32.5 kDa,  $R_{HYD}$  2.54 nm (McCord and Fridovich, 1969); ovalbumin,  $M_w$  43-45 kDa,  $R_{HYD}$  2.92 nm ((Shearwin and Winzor, 1990)). Fluorescent image exposures in column A were acquired 5 min. following the addition of the protein-rhodamine conjugate and images shown in column B were acquired following a subsequent wash with PBS (exposure times taken for each image are indicated). The absence of post fluorescence using ovalbumin and SOD is consistent with the absence of non-specific binding and exclusion from the hydrogel matrix due to their respective molecular dimensions.  $\beta$ -lactoglobulin A, however, shows uniform penetration, which is again predicted by the calculated average mesh size for posts. The retention of fluorescence at the exterior of post surfaces following a brief wash (column B, 40 ms exposure) is enhanced by the longer exposure time and was found to be absent subsequent to extensive washing with PBS.

**A**

**7 ms**

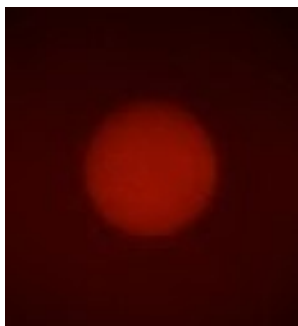

**B**

**40 ms**

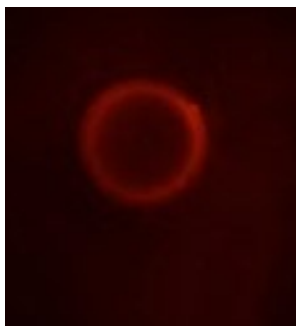

***lactoglobulin A***

**20 ms**

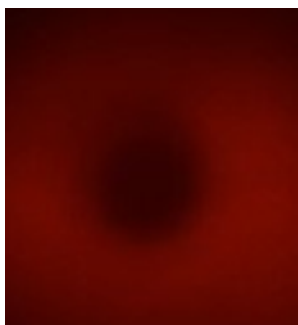

**60 ms**

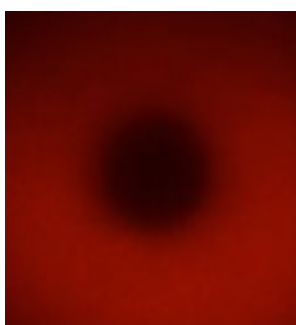

***ovalbumin***

**70 ms**

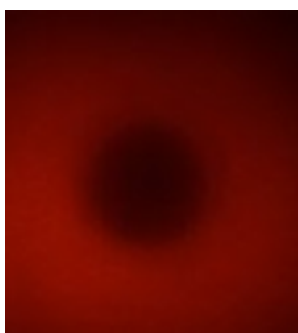

**200 ms**

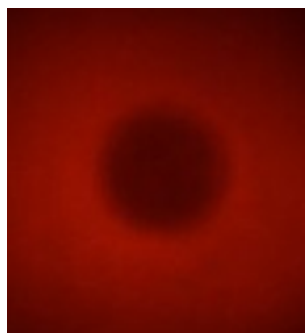

***SOD***

**Fig S2.** Fluorescent images of biotin/NA rhodamine assay with 0.2%, 0.5% 1% (w/w) of biotin.

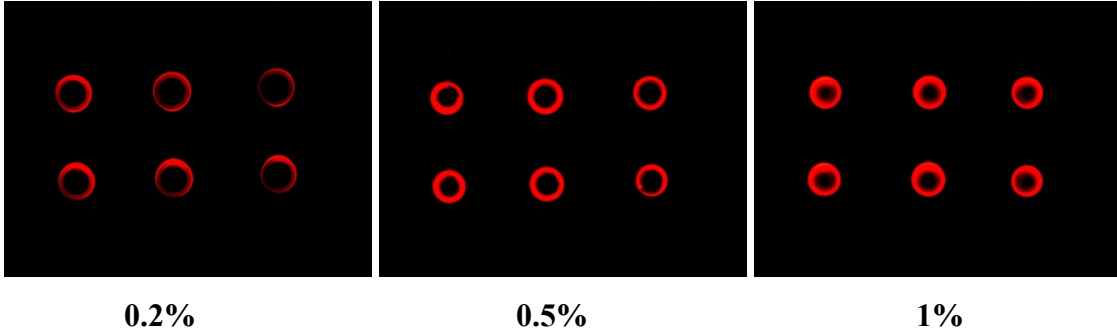

### Average Mesh Size calculation

The hydrogel mesh size is estimated based on Flory-Rehner Equation. Where the 20% (w/w) PEGDA 700 solution was used to fabricate hydrogel structures. If we assume the mass swelling ratio  $Q_m = 4$  (where the water has evaporated completely). We can get the

$$v_{2,s} = \frac{\frac{1}{\rho_{polymer}}}{\frac{Q_m}{\rho_{solvent}} + \frac{1}{\rho_{polymer}}} = 0.183$$

polymer volume fraction in the swollen state  $v_{2,s}$ , which is

Where  $\rho_{solvent} = 1g/mL$  and  $\rho_{polymer} = 1.12g/mL$

Then we inserted the value of  $v_{2,s}$  into equation 1 to get the average molecular weight between two adjacent crosslinks  $\overline{M}_c = 250 g/mol$

$$\frac{1}{\overline{M}_c} = \frac{1}{\overline{M}_n} - \frac{\frac{\overline{v}}{V_1} [ln(1 - v_{2,s}) + v_{2,s} + \chi_1 v_{2,s}^2]}{(v_{2,s}^{1/3} - \frac{v_{2,s}}{2})} \quad (1)$$

Here  $\overline{M}_n = 700$ , which is the molecular weight of the polymer chains without crosslinking agent.  $\chi_1$  is a polymer-solvent interaction parameter, the value is 0.494 for PEG according to polymerdatabase.

The average mesh size can be calculated by equation (2) as,

$$\xi = \alpha(\overline{r}_0^2)^{1/2} \quad (2)$$

$\alpha$  in equation (2) is the elongation ratio of polymer chains in any directions and  $(\bar{r}_0^2)^{1/2}$  represents the distance of the polymer chains between two adjacent crosslinks, which is the average root distance and unperturbed.

$\alpha$  and  $(\bar{r}_0^2)^{1/2}$  can be further represented as,

$$\alpha = v_{2,s}^{-1/3} \quad (3)$$

$$(\bar{r}_0^2)^{1/2} = l(C_n N) = l\left(\frac{2C_n \bar{M}_c}{M_r}\right)^{1/2} l \quad (4)$$

Here,  $l$  represents the length of the bond along polymer backbone and  $C_n$  is the Flory characteristic ratio.  $M_r$  is the molecular weight of repeating units in the composing polymer chains. If equations (3) and (4) are combined, the mesh size can be expressed as,<sup>71</sup>

$$\xi = v_{2,s}^{-1/3} \left(\frac{2C_n \bar{M}_c}{M_r}\right)^{1/2} l \quad (5)$$

In our system  $M_r = 44 \text{ g/mol}$ ,  $l$  for or vinyl polymers is  $1.54 \text{ \AA}$  and  $C_n$  is 6.9 according to the polymerdatabase. When we insert all those values into equation (5) we can get the average mesh size of the hydrogel in our system is about 2.4 nm.

| <i>time (min.)</i> | FI of Convection | FI of Mass Diffusion | <b>Table T1.</b><br>Fluorescent signal of convection assay V.S. mass diffusion assay recorded as a function of time. |
|--------------------|------------------|----------------------|----------------------------------------------------------------------------------------------------------------------|
| 0                  | 0                | 0                    |                                                                                                                      |
| 1                  | 18.96733         | 0.17933333           |                                                                                                                      |
| 3                  | 32.40033         | 0.184                |                                                                                                                      |
| 5                  | 40.58233         | 0.14                 |                                                                                                                      |
| 7                  | 45.934           | 0.29                 |                                                                                                                      |
| 10                 | 54.13267         | 3.43333333           |                                                                                                                      |
| 20                 | 78.746           | 6.92666667           |                                                                                                                      |
| 30                 | 85.89733         | 9.80533333           |                                                                                                                      |
| 60                 | 97.259           | 9.07333333           |                                                                                                                      |
| 120                | 107.389          | 15.999               |                                                                                                                      |
| 240                | 113.3967         | 19.6993333           |                                                                                                                      |

**Table T2.** First derivatives ( $f'(x)$ ) of convection and mass diffusion plots for absolute fluorescence units recorded as a function of time. Convection (hyperbolic plot, where  $y = 19.247\ln(x) + 14.126$ ),  $R^2 = 0.975$ ). Mass Diffusion (second-order polynomial plot, where  $y = -0.0005x^2 + 0.195 + 0.654$ ,  $R^2 = 0.930$ ).

| <i>time (min.)</i> | <b>Convection</b> | <b>Mass Diffusion</b> |
|--------------------|-------------------|-----------------------|
| 1                  | 19.25             | 0.184                 |
| 3                  | 6.42              | 0.182                 |
| 5                  | 3.85              | 0.180                 |
| 7                  | 2.75              | 0.178                 |
| 10                 | 1.92              | 0.175                 |
| 20                 | 0.96              | 0.165                 |
| 30                 | 0.64              | 0.155                 |
| 60                 | 0.32              | 0.125                 |
| 120                | 0.16              | 0.065                 |
| 240                | 0.08              | 0.055                 |
